# Supplementary material for: Computational modeling for the enhancement of thermosonicated Sohphie (Myrica esculenta) fruit juice quality using artificial neural networks (ANN) coupled with a genetic algorithm
Source: Royal Society of Chemistry journal article supplement (doi:10.1039/d4fb00004h), 2024-01-01
Supplement: d4fb00004h1.pdf [file d4fb00004h1.pdf]

## Supplementary Tables

**Supplementary Table 1** Experimental outputs for the conducted thermosonication trials.

| Treatment     | PH   | TSS  | TA   | CI    | BI    | AA    | AOA   | TAC   | TCC    | TPC   | TFC   | TVC  | YM   |
|---------------|------|------|------|-------|-------|-------|-------|-------|--------|-------|-------|------|------|
| TSSJ-30-30-15 | 4.02 | 5.97 | 3.49 | 1.102 | 0.117 | 40.54 | 46.04 | 28.81 | 113.77 | 55.47 | 41.26 | 4.44 | 2.94 |
| TSSJ-30-30-30 | 3.95 | 5.93 | 3.57 | 1.175 | 0.124 | 42.65 | 47.36 | 30.75 | 119.34 | 57.51 | 43.59 | 4.32 | 2.86 |
| TSSJ-30-30-45 | 3.91 | 6.00 | 3.61 | 1.240 | 0.152 | 44.95 | 48.47 | 32.62 | 125.01 | 59.12 | 45.80 | 4.26 | 2.72 |
| TSSJ-30-30-60 | 3.87 | 6.03 | 3.64 | 1.293 | 0.175 | 47.11 | 49.80 | 35.40 | 133.60 | 61.41 | 47.33 | 4.18 | 2.64 |
| TSSJ-30-40-15 | 3.97 | 6.00 | 3.55 | 1.324 | 0.137 | 43.36 | 47.69 | 30.03 | 115.25 | 56.09 | 42.88 | 4.35 | 2.83 |
| TSSJ-30-40-30 | 3.92 | 5.97 | 3.61 | 1.396 | 0.158 | 45.29 | 48.74 | 33.66 | 116.59 | 58.66 | 44.87 | 4.21 | 2.66 |
| TSSJ-30-40-45 | 3.83 | 6.00 | 3.68 | 1.437 | 0.171 | 47.32 | 49.19 | 35.19 | 118.65 | 60.66 | 46.67 | 4.15 | 2.52 |
| TSSJ-30-40-60 | 3.85 | 6.03 | 3.73 | 1.493 | 0.188 | 49.16 | 51.07 | 36.68 | 120.59 | 62.26 | 48.34 | 4.07 | 2.44 |
| TSSJ-30-50-15 | 3.95 | 6.00 | 3.62 | 1.526 | 0.149 | 46.37 | 58.89 | 31.90 | 116.21 | 57.01 | 43.57 | 4.22 | 2.71 |
| TSSJ-30-50-30 | 3.88 | 6.00 | 3.67 | 1.585 | 0.170 | 48.25 | 60.35 | 33.29 | 118.24 | 59.68 | 45.64 | 4.12 | 2.58 |
| TSSJ-30-50-45 | 3.80 | 6.03 | 3.72 | 1.607 | 0.186 | 51.10 | 63.37 | 32.58 | 119.65 | 61.39 | 47.23 | 4.04 | 2.43 |
| TSSJ-30-50-60 | 3.72 | 6.07 | 3.76 | 1.625 | 0.194 | 52.93 | 64.61 | 31.29 | 117.78 | 63.68 | 49.76 | 3.92 | 2.33 |
| TSSJ-40-30-15 | 3.72 | 6.03 | 3.60 | 1.446 | 0.144 | 43.30 | 48.55 | 34.76 | 115.36 | 58.54 | 43.72 | 4.24 | 2.73 |
| TSSJ-40-30-30 | 3.69 | 5.87 | 3.63 | 1.499 | 0.158 | 45.46 | 51.70 | 39.18 | 123.89 | 62.01 | 45.15 | 4.03 | 2.47 |
| TSSJ-40-30-45 | 3.63 | 5.90 | 3.68 | 1.534 | 0.177 | 47.45 | 53.51 | 44.28 | 126.92 | 66.23 | 47.67 | 3.87 | 2.38 |
| TSSJ-40-30-60 | 3.59 | 6.00 | 3.74 | 1.583 | 0.189 | 49.54 | 55.39 | 48.50 | 129.50 | 69.57 | 51.42 | 3.74 | 2.02 |
| TSSJ-40-40-15 | 3.65 | 5.93 | 3.65 | 1.603 | 0.164 | 46.69 | 54.52 | 35.73 | 119.21 | 60.59 | 44.53 | 4.15 | 2.64 |
| TSSJ-40-40-30 | 3.61 | 5.97 | 3.71 | 1.684 | 0.175 | 50.48 | 56.49 | 37.41 | 122.89 | 64.89 | 46.10 | 3.82 | 2.35 |
| TSSJ-40-40-45 | 3.56 | 6.00 | 3.77 | 1.747 | 0.188 | 54.70 | 58.19 | 39.53 | 125.78 | 68.96 | 48.73 | 3.73 | 2.07 |
| TSSJ-40-40-60 | 3.53 | 5.93 | 3.81 | 1.796 | 0.197 | 58.74 | 60.28 | 43.13 | 126.61 | 72.08 | 53.71 | 3.60 | 1.86 |
| TSSJ-40-50-15 | 3.57 | 6.00 | 3.75 | 1.800 | 0.172 | 48.86 | 57.38 | 36.48 | 120.54 | 62.58 | 46.66 | 4.02 | 2.53 |
| TSSJ-40-50-30 | 3.50 | 6.07 | 3.80 | 1.825 | 0.189 | 52.91 | 62.46 | 35.59 | 117.35 | 66.83 | 48.10 | 3.74 | 2.21 |
| TSSJ-40-50-45 | 3.45 | 6.00 | 3.85 | 1.870 | 0.194 | 53.62 | 64.40 | 35.01 | 116.73 | 70.35 | 51.77 | 3.56 | 1.88 |
| TSSJ-40-50-60 | 3.40 | 5.90 | 3.91 | 1.897 | 0.197 | 54.14 | 66.11 | 34.29 | 115.20 | 74.71 | 53.83 | 3.35 | 1.57 |
| TSSJ-50-30-15 | 3.67 | 6.07 | 3.78 | 1.738 | 0.168 | 46.26 | 52.16 | 38.50 | 117.67 | 61.79 | 46.17 | 4.06 | 2.30 |
| TSSJ-50-30-30 | 3.61 | 5.87 | 3.86 | 1.790 | 0.175 | 47.52 | 54.00 | 40.59 | 125.37 | 65.38 | 49.50 | 3.76 | 2.03 |
| TSSJ-50-30-45 | 3.50 | 6.03 | 3.92 | 1.816 | 0.184 | 50.10 | 56.07 | 43.26 | 127.62 | 69.71 | 52.56 | 3.52 | 1.83 |
| TSSJ-50-30-60 | 3.42 | 5.93 | 3.95 | 1.885 | 0.191 | 55.32 | 58.18 | 45.34 | 130.12 | 73.85 | 55.49 | 3.36 | 1.55 |
| TSSJ-50-40-15 | 3.57 | 6.03 | 3.84 | 1.841 | 0.174 | 44.87 | 55.59 | 37.08 | 121.39 | 63.42 | 47.78 | 3.84 | 2.20 |
| TSSJ-50-40-30 | 3.40 | 6.07 | 3.96 | 1.919 | 0.183 | 47.34 | 57.68 | 35.93 | 123.61 | 67.87 | 50.40 | 3.54 | 1.76 |
| TSSJ-50-40-45 | 3.37 | 6.03 | 4.07 | 1.975 | 0.198 | 52.87 | 60.27 | 33.61 | 126.84 | 73.72 | 51.55 | 3.21 | 1.44 |
| TSSJ-50-40-60 | 3.35 | 5.93 | 4.11 | 2.031 | 0.207 | 53.07 | 61.04 | 32.54 | 129.66 | 78.94 | 54.09 | 2.89 | 1.24 |
| TSSJ-50-50-15 | 3.48 | 5.97 | 4.02 | 1.963 | 0.181 | 43.37 | 58.56 | 35.15 | 118.74 | 66.63 | 48.97 | 3.66 | 2.03 |
| TSSJ-50-50-30 | 3.36 | 6.00 | 4.08 | 2.041 | 0.193 | 45.97 | 60.70 | 33.24 | 115.89 | 71.28 | 51.16 | 3.33 | 1.54 |
| TSSJ-50-50-45 | 3.29 | 6.00 | 4.14 | 2.160 | 0.201 | 47.29 | 61.67 | 31.02 | 114.70 | 74.59 | 52.62 | 2.93 | 1.25 |
| TSSJ-50-50-60 | 3.22 | 6.00 | 4.21 | 2.162 | 0.210 | 46.29 | 62.88 | 30.26 | 112.48 | 76.34 | 53.78 | 2.44 | 1.01 |

Abbreviations: TSSJ-Thermosonicated sophie juice 30, 40 and 50%, Temperature 30, 40 and 50°C, and Treatment time 15, 30, 45 and 60 min. TSS=total soluble solid; TA= titrable acidity; CI= cloudiness; BI= browning index; AA=ascorbic acid; AOA=antioxidant activity; TAC=total anthocyanin content; TCC=total carotenoid content; TPC= total phenolic content; TFC= total flavonoid content; YM= yeast and mould count.

**Supplementary Table 2** Predicted network outputs from ANN modelling.

| Treatment      | PH    | TSS    | TA    | CI    | BI    | AA    | AOA    | TAC   | TCC    | TPC   | TFC   | TVC    | YM     |
|----------------|-------|--------|-------|-------|-------|-------|--------|-------|--------|-------|-------|--------|--------|
| TSSJ-30-30-15  | 3.97  | 5.97   | 3.52  | 1.213 | 0.128 | 43.76 | 47.11  | 34.14 | 119.65 | 56.53 | 42.41 | 4.39   | 2.88   |
| TSSJ-30-30-30  | 3.94  | 5.97   | 3.54  | 1.240 | 0.138 | 45.55 | 47.89  | 35.29 | 122.22 | 57.54 | 43.48 | 4.34   | 2.83   |
| TSSJ-30-30-45  | 3.90  | 5.97   | 3.56  | 1.272 | 0.154 | 47.85 | 49.15  | 36.56 | 124.90 | 59.33 | 45.22 | 4.27   | 2.74   |
| TSSJ-30-30-60  | 3.86  | 5.97   | 3.59  | 1.310 | 0.172 | 50.41 | 51.03  | 37.90 | 127.35 | 62.19 | 47.61 | 4.14   | 2.59   |
| TSSJ-30-40-15  | 3.93  | 5.99   | 3.55  | 1.320 | 0.137 | 44.74 | 49.68  | 32.14 | 116.35 | 57.04 | 42.87 | 4.35   | 2.85   |
| TSSJ-30-40-30  | 3.89  | 6.00   | 3.58  | 1.365 | 0.152 | 46.84 | 51.78  | 32.98 | 118.23 | 58.46 | 44.26 | 4.28   | 2.77   |
| TSSJ-30-40-45  | 3.84  | 6.00   | 3.62  | 1.417 | 0.171 | 49.33 | 54.46  | 33.97 | 120.59 | 60.85 | 46.35 | 4.16   | 2.63   |
| TSSJ-30-40-60  | 3.78  | 6.00   | 3.67  | 1.474 | 0.187 | 51.87 | 57.40  | 35.11 | 123.24 | 64.33 | 48.91 | 3.99   | 2.41   |
| TSSJ-30-50-15  | 3.88  | 6.02   | 3.60  | 1.487 | 0.150 | 45.91 | 55.40  | 30.79 | 114.36 | 57.76 | 43.48 | 4.29   | 2.79   |
| TSSJ-30-50-30  | 3.82  | 6.02   | 3.64  | 1.549 | 0.169 | 48.27 | 58.32  | 31.34 | 115.44 | 59.71 | 45.22 | 4.19   | 2.66   |
| TSSJ-30-50-45  | 3.75  | 6.02   | 3.70  | 1.614 | 0.186 | 50.84 | 60.89  | 32.02 | 117.00 | 62.75 | 47.61 | 4.02   | 2.46   |
| TSSJ-30-50-60  | 3.68  | 6.02   | 3.76  | 1.678 | 0.197 | 53.23 | 62.84  | 32.84 | 119.07 | 66.70 | 50.18 | 3.78   | 2.18   |
| TSSJ-40-30-15  | 3.84  | 5.97   | 3.60  | 1.402 | 0.138 | 43.87 | 48.06  | 36.40 | 120.73 | 58.45 | 43.91 | 4.28   | 2.75   |
| TSSJ-40-30-30  | 3.78  | 5.97   | 3.64  | 1.457 | 0.154 | 45.70 | 49.42  | 37.74 | 123.39 | 60.84 | 45.86 | 4.16   | 2.60   |
| TSSJ-40-30-45  | 3.70  | 5.97   | 3.70  | 1.518 | 0.173 | 48.02 | 51.41  | 39.11 | 126.01 | 64.32 | 48.36 | 3.98   | 2.36   |
| TSSJ-40-30-60  | 3.62  | 5.97   | 3.76  | 1.581 | 0.189 | 50.59 | 54.02  | 40.46 | 128.28 | 68.43 | 50.87 | 3.73   | 2.06   |
| TSSJ-40-40-15  | 3.76  | 5.99   | 3.67  | 1.596 | 0.152 | 44.87 | 52.19  | 33.85 | 117.09 | 59.70 | 44.79 | 4.18   | 2.64   |
| TSSJ-40-40-30  | 3.68  | 5.99   | 3.73  | 1.661 | 0.171 | 47.01 | 54.94  | 34.96 | 119.20 | 62.74 | 47.07 | 4.01   | 2.42   |
| TSSJ-40-40-45  | 3.59  | 5.99   | 3.80  | 1.725 | 0.187 | 49.52 | 57.88  | 36.20 | 121.72 | 66.68 | 49.66 | 3.77   | 2.13   |
| TSSJ-40-40-60  | 3.51  | 5.99   | 3.87  | 1.786 | 0.198 | 52.04 | 60.53  | 37.53 | 124.40 | 70.75 | 51.94 | 3.48   | 1.81   |
| TSSJ-40-50-15  | 3.65  | 6.01   | 3.77  | 1.800 | 0.169 | 46.06 | 58.78  | 31.93 | 114.78 | 61.33 | 45.86 | 4.04   | 2.47   |
| TSSJ-40-50-30  | 3.57  | 6.01   | 3.84  | 1.856 | 0.186 | 48.45 | 61.26  | 32.74 | 116.05 | 64.95 | 48.37 | 3.81   | 2.20   |
| TSSJ-40-50-45  | 3.49  | 6.01   | 3.91  | 1.906 | 0.197 | 51.02 | 63.10  | 33.69 | 117.83 | 69.09 | 50.87 | 3.52   | 1.88   |
| TSSJ-40-50-60  | 3.42  | 6.02   | 3.98  | 1.951 | 0.204 | 53.38 | 64.32  | 34.78 | 120.11 | 72.79 | 52.83 | 3.22   | 1.57   |
| TSSJ-50-30-15  | 3.60  | 5.96   | 3.77  | 1.707 | 0.154 | 43.98 | 49.70  | 38.94 | 121.86 | 62.72 | 46.55 | 4.00   | 2.38   |
| TSSJ-50-30-30  | 3.52  | 5.96   | 3.84  | 1.770 | 0.173 | 45.84 | 51.81  | 40.30 | 124.55 | 66.67 | 49.12 | 3.75   | 2.07   |
| TSSJ-50-30-45  | 3.44  | 5.96   | 3.91  | 1.828 | 0.189 | 48.20 | 54.49  | 41.60 | 127.05 | 70.73 | 51.52 | 3.46   | 1.75   |
| TSSJ-50-30-60  | 3.38  | 5.97   | 3.98  | 1.882 | 0.199 | 50.77 | 57.43  | 42.79 | 129.11 | 74.04 | 53.26 | 3.16   | 1.48   |
| TSSJ-50-40-15  | 3.49  | 5.99   | 3.88  | 1.893 | 0.171 | 45.00 | 55.43  | 36.05 | 117.94 | 64.94 | 47.82 | 3.80   | 2.14   |
| TSSJ-50-40-30  | 3.42  | 5.99   | 3.95  | 1.939 | 0.187 | 47.17 | 58.35  | 37.37 | 120.25 | 69.07 | 50.38 | 3.51   | 1.82   |
| TSSJ-50-40-45  | 3.37  | 5.99   | 4.01  | 1.979 | 0.198 | 49.70 | 60.91  | 38.73 | 122.88 | 72.78 | 52.48 | 3.21   | 1.53   |
| TSSJ-50-40-60  | 3.32  | 5.99   | 4.07  | 2.014 | 0.204 | 52.21 | 62.86  | 40.10 | 125.53 | 75.45 | 53.87 | 2.95   | 1.31   |
| TSSJ-50-50-15  | 3.41  | 6.01   | 3.99  | 2.020 | 0.186 | 46.21 | 61.61  | 33.57 | 115.27 | 67.33 | 49.12 | 3.55   | 1.89   |
| TSSJ-50-50-30  | 3.35  | 6.01   | 4.04  | 2.048 | 0.198 | 48.63 | 63.34  | 34.65 | 116.76 | 71.33 | 51.52 | 3.25   | 1.59   |
| TSSJ-50-50-45  | 3.31  | 6.01   | 4.09  | 2.071 | 0.204 | 51.20 | 64.47  | 35.85 | 118.76 | 74.47 | 53.26 | 2.98   | 1.35   |
| TSSJ-50-50-60  | 3.28  | 6.01   | 4.13  | 2.089 | 0.207 | 53.53 | 65.17  | 37.16 | 121.22 | 76.51 | 54.33 | 2.78   | 1.20   |
| R <sup>2</sup> | 0.966 | 0.870  | 0.952 | 0.998 | 0.988 | 0.982 | 0.960  | 0.821 | 0.989  | 0.932 | 0.980 | 0.995  | 0.984  |
| MSE            | 0.288 | 0.548  | 0.288 | 0.395 | 0.503 | 0.203 | 0.199  | 0.270 | 0.199  | 0.617 | 0.173 | 0.304  | 0.571  |
| MAE            | 0.001 | -0.004 | 0.007 | 0.000 | 0.000 | 0.101 | -0.113 | 0.029 | 0.266  | 0.125 | 0.033 | -0.002 | -0.018 |

Abbreviations: TSSJ=Thermosonicated sophie juice 30, 40 and 50%, Temperature 30, 40 and 50°C, and Treatment time 15, 30, 45 and 60 min. TSS=total soluble solid; TA= titrable acidity; CI= cloudiness; BI= browning index; AA=ascorbic acid; AOA=antioxidant activity; TAC=total anthocyanin content; TCC=total carotenoid content; TPC= total phenolic content; TFC= total flavonoid content; YM= yeast and mould count; R=Coefficient of determination; MSE= mean square error; MAE=mean absolute error.

**Supplementary Table 3** List of Abbreviation

|    |     |                            |    |      |                              |
|----|-----|----------------------------|----|------|------------------------------|
| 1  | TA  | Titration Acidity          | 14 | R    | Coefficient of determination |
| 2  | TSS | Total Soluble Solids       | 15 | MSE  | Mean square error            |
| 3  | CI  | Cloudiness                 | 16 | MAE  | Mean absolute error          |
| 4  | BI  | Browning Index             | 17 | TS   | Thermosonication             |
| 5  | AA  | Ascorbic Acid              | 18 | PS   | Pasteurization               |
| 6  | AOA | Antioxidant Activity       | 19 | SJ   | Sophie Juice                 |
| 7  | TAC | Total Anthocyanin Content  | 20 | RSJ  | Raw Sophie juice             |
| 8  | TCC | Total Carotenoids Content  | 21 | TSSJ | Thermosonicated Sophie Juice |
| 9  | TPC | Total Phenolic Content     | 22 | PSSJ | Pasteurized Sophie Juice     |
| 10 | TFC | Total Flavonoid Content    | 23 | ND   | Not Detected                 |
| 11 | TVC | Total Viable Content       | 24 | ANN  | Artificial neural network    |
| 12 | YMC | Yeast and Mould count      | 25 | QE   | Quercetin equivalent         |
| 13 | GAE | Gallic acid equivalents    | 26 | CFU  | Colony forming unit          |
| 27 | ANN | Artificial neural networks | 28 | GA   | Genetic Algorithms           |
